# Supplementary material
Source: Research Square preprint supplement (doi:10.21203/rs.3.rs-9784287/v1)
Supplement: Supplementary file 1 [file 14fe48e73b127b770e4b61cd.docx]

## **8.1. Information Sheet and Voluntary Consent Form for The Participant Greater Than or Equal to 18 years Old**

My name is ______________. I am working as data collector for the study being conducted in this village by **Ahmednur mahammed** who is studying research for his Master’s degree Public Health Nutrition Track at Haramaya University, the college of Health and Medical science. I kindly request your attention to explain you about the study and your institutions being selected as the study setting.

**Study title**

Household dietary diversity, women’s body mass index and associated factors among productive safety net program beneficiary and non beneficiary Household in chiro Woreda, Eastern Ethiopia.

**Purpose of the Study**

The findings of this study will contribute some important information to PSNP stakeholders how to plan and allocate appropriate resources, especially for women. In addition, it is critical that local government and non-governmental parties working on PSNP service and all beneficiaries of a PSNP in the study area will be expected to benefit from the findings at large. Moreover, the aim of this study is to write a thesis as a partial requirement for the fulfillment of a Master’s Program in Nutrition for the principal investigator.

**Procedure and duration:**

I will interview the study participants using a questionnaire to provide me a relevant data which is helpful for the study. I will interview them and will also select the key informants for in-depth interview that will take about 60 minutes (30 minutes for interview participants and 30 minutes for in-depth interview) minutes using a questionnaire.

**Risks and benefits:**

The risk of participating in this study is minimal, but only taking few minutes from your time. There would not be any direct payment for participating in this study. However, the findings from this research may reveal important information for the local health planners.

**5. Confidentiality:**

The information that you will provide will be kept confidential. There will be no information that will identify you in particular. The findings of the study will be general for the study community and will not reflect anything particular of individual persons. The questionnaire will be coded to exclude showing names. No reference will be made in oral or written reports that could link participants to the research.

**Rights:**

Participation for this study is voluntary. You have the right to declare to participate or not in this study. If you decide to participate, you have the right to withdraw from the study at any time and this will not label you for any loss of benefits, which you otherwise are entitled. you do not have to answer any question that youc do not want to answer.

**Contact Address:**

If you have any question about the study, the procedure or anything else related to the study, please contact through the following address: -

Mobile phone of Investigator: +251-911838870 Email- nur4love@gmial.com

Institution health Research Ethics Review committee IHRERC of Haramaya University:

Office phone: - Tel. 0254662011: P. O. BOX: 235, Harar

**Declaration of informed voluntary consent:**

I have read/ was read to me the participant information sheet. I have clearly understood the purpose of the research, the procedures, the risks and benefits, issues of confidentiality, the rights of participating and the contact address for any queries. I have been given the opportunity to ask questions for things that may have been unclear. I was informed that I have the right to withdraw from the study at any time or not to answer any question that I do not want. Therefore, I declare my voluntary consent to participate in this study with my initials (signature).

Name and Signature of participant: ______ ________ Date ________

Name and Signature of Data Collector: _____ _______ ________ Date ______

N.B

- This is signed face to face in the presence of the data collector.
- Please provide a copy of this signed consent to the participant.
- If the participant is a lay person and cannot sign initials, can put his/her thumb print in front of a competent witness; and the witness has to sign alongside (with his/her name and address).

## **8.2. Information Sheet and Voluntary Consent Form for parents/Guardians of Participant Less than 18 Years’ Old**

My name is ______________. I am working as data collector for the study being conducted in this village by **Ahmednur mahammed** who is studying research for his Master’s degree Public Health Nutrition Track at Haramaya University, the college of Health and Medical science. I kindly request your attention to explain you about the study and your institutions being selected as the study setting.

**Study title**

Household dietary diversity, and associated factors among productive safety net program beneficiary and non beneficiary Household in chiro Woreda, Eastern Ethiopia.

**Purpose of the Study**

The findings of this study will contribute some important information to PSNP stakeholders how to plan and allocate appropriate resources, especially for women. In addition, it is critical that local government and non-governmental parties working on PSNP service and all beneficiaries of a PSNP in the study area will be expected to benefit from the findings at large. Moreover, the aim of this study is to write a thesis as a partial requirement for the fulfillment of a Master’s Program in Nutrition for the principal investigator.

**Procedure and duration:**

I will interview the study participants using a questionnaire to provide me a relevant data which is helpful for the study. I will interview them and will also select the key informants for in-depth interview that will take about 60 minutes (30 minutes for interview participants and 30 minutes for in-depth interview) minutes using a questionnaire.

**Risks and benefits:**

The risk of participating in this study is minimal, but only taking few minutes from your doughters/wifes time. There would not be any direct payment for participating in this study. However, the findings from this research may reveal important information for the local health planners.

**5. Confidentiality:**

The information that your doughters/wifes provide will be kept confidential. There will be no information that will identify he in particular. The findings of the study will be general for the study community and will not reflect anything particular of individual persons. The questionnaire will be coded to exclude showing names. No reference will be made in oral or written reports that could link participants to the research.

**Rights:**

Participation for this study is voluntary. your doughters/wifes has the right to declare to participate or not in this study. If she decides to participate, she has the right to withdraw from the study at any time and this will not label her for any loss of benefits, which she otherwise is entitled. She does not have to answer any question that she does not want to answer.

**Contact Address:**

If you have any question about the study, the procedure or anything else related to the study, please contact through the following address: -

Mobile phone of Investigator: +251-911838870 Email- nur4love@gmial.com

Institution health Research Ethics Review committee IHRERC of Haramaya University:

Office phone: - Tel. 0254662011: P. O. BOX: 235, Harar

**Declaration of informed voluntary consent:**

I have read/ was read to me the participant information sheet. I have clearly understood the purpose of the research, the procedures, the risks and benefits, issues of confidentiality, the rights of participating and the contact address for any queries. I have been given the opportunity to ask questions for things that may have been unclear. I was informed that my doughters/wifes has the right to withdraw from the study at any time or not to answer any question that she does not want. Therefore, I declare my voluntary consent to participate in this study with my initials (signature).

Name and Signature of parents/Guardians: ______ ________ Date ________

Name and Signature of Data Collector: _____ _______ ________ Date ______

N.B

- This is signed face to face in the presence of the data collector.
- Please provide a copy of this signed consent to the participant.
- If the participant is a lay person and cannot sign initials, can put his/her thumb print in front of a competent witness; and the witness has to sign alongside (with his/her name and address).

## **8.3. English Version Questionnaires**

**Circle questions that have Choices and write on space provided for others**

**Address of the HH**

Woreda __________________

Kebele ___________________

Data recorder name____________________ signature _________date__________//___//

Supervisor name _________________ signature ____________ date__________//___//

HH’s Unique number ______________

| PART 1: Socio- Demographic characteristics | | | | | | | | | | | | |
| --- | --- | --- | --- | --- | --- | --- | --- | --- | --- | --- | --- | --- |
| Code | Particulars | | | Catagories of response | | | Code | | Skip to Q | | | |
| Q101 | Sex of HH head | | | 1. Male headed  2. Female headed | | |  | |  | | | |
| Q102 | Age of woman | | | ___________Age in years | | |  | |  | | | |
| Q103 | Religion | | | 1.Orthodox  2 Muslims  3. Protestant  4. Wakefata  5.Others specify --------- | | |  | |  | | | |
| Q104 | Marital status | | | 1.Married  2. Divorced  3.Widowed  4.Single | | |  | |  | | | |
| Q105 | What is your house hold size | | | ________________ | | |  | |  | | | |
| Q106 | Weight of the responder | | | _________________ | | |  | |  | | | |
| Q107 | Height of the responder | | | ----------------------------- | | |  | |  | | | |
| Q108 | PSNP membership | | | 1.yes  2.No | | |  | |  | | | |
|  | | | | | | | | | | | | |
|  | | | | | | | | | | | | |
| PART 3: INDIVIDUALS FOOD KNOWLEDGE AND SKILLS FACTORS | | | | | | | | | | | | |
| PART 4: Dietary diversity score and food intake practices in the last 24 hours   | Interviewer reads:  I will ask you some questions about the food you ate yesterday, and your answers should be yes or no. First I would like you just to think about yesterday, from the time you woke up including whole day and night. Think to yourself about the first thing you ate or drank after you woke up in the morning …think about where you were when you had any food or drink in the middle of the day …and any snacks or drinks you may have had in the morning, between meals …Think about where you were when you had any evening meal …and any snacks or drinks you may have had in the afternoon, between meals …and where you were after dinner, and any food or drink you may have had in the evening or late-night...  Now I will ask you about what you ate or drank yesterday. Please listen to the list of foods I read in each question, and if you ate any one of them, say yes: For example, if I ask ‘Did you eat injera, bread, or porridge’ and you only ate injera, you would answer ‘yes.’ When I ask you each question, please consider foods eaten in mixed dishes, where these foods were included as an ingredient, mixed with other foods, as well as foods eaten on their own, and please respond "YES" or "NO". | | | | --- | --- | --- | | *(Do not read*  *food group names)* | Yesterday, did you eat any of the following foods? | *circle answer* | | D01 W*hole grains 1* | Enjera, bread, from grains, oats  or maize? | YES or NO | | D02 Other foods made from grains | Commercial bread, kita, chechebassa, rice, pasta, or macaroni? | YES or NO | | D03 *white roots/tubers* | Potatoes, sweet potato, any food from enset,qocho) | YES or NO | | D04.2 *legumes 2* | Any kind of kik, shiro, or ful? | YES or NO | |  | Yesterday, did you eat any of the following vegetables? |  | | D05 V*itamin A-rich orange*  *Veg* | Pumpkin, carrots, squash, or sweet potatoes that are  orange inside? | YES or NO | | D06 *Dark Green Leafy Vegetable* | Ethiopian kale, Swiss chard, broccoli, spinach, moringa leaves/ Shiferaw/Aleko, cassava leaves,  sweet potato leaves? | YES or NO | | D07.1 O*ther vegetables 1* | Tomato, eggplant, beetroot, green beans, zucchini,  or leek? | YES or NO | | D07.2 *Other vegetables 2* | Cucumber, pepper green, lettuce, head cabbage,  cauliflower, or celery? | YES or NO | |  | Yesterday, did you eat any of the following fruits? |  | | D08 *Vitamin A-rich fruits* | Mangoes, papaya, or peach kok? | YES or NO | | D09 *citrus* | Orange, mandarin or grapefruit? | YES or NO | | D10.1 *other fruits 1* | Banana, avocado, pineapple, pome apple, dates  zebib, or beles? | YES or NO | | D10.2 *other fruits 2* | Guava, watermelon, strawberries, or cherries  prim? | YES or NO | |  | Yesterday, did you eat any of the following sweets? |  | | D11 *baked sweets* | Cakes, cookies, sweetbreads, sweet biscuits,  baklava, bombolino, or donut? | YES or NO | | D12 *other sweets* | Ice cream, candies, chocolate? | YES or NO | |  | Yesterday, did you eat any of the following foods of animal origin? |  | | D13 *eggs* | Eggs? | YES or NO | | D14 *dairy foods* | Cheese, cottage cheese, yogurt or feta? | YES or NO | | D15 *processed meat* | Sausages, canned meat, hamburger, or burger? | YES or NO | | D16.1 *unprocessed red meat*  *ruminants* | Beef, sheep, goat, kuanta, or dulet? | YES or NO | | D16.2 unprocessed red meat 2 | Pork or camel? | YES or NO | | D17 *poultry* | Chicken or duck? | YES or NO | | D18 *fish & seafood* | Fish, dried fish, tuna or canned fish? | YES or NO | |  | Yesterday, did you eat any of the following other foods? |  | | D19 *nuts & seeds* | Groundnut, peanut butter, selit, suf fitfit, suf water,  kolo with nuts, or kolo with sunflower seeds suf? | YES or NO | | D20 *ultra-processed salty*  *packed snacks* | Potato chips, packed chips or puffed corn snacks? | YES or NO | | D21 *instant noodles* | Indomin? | YES or NO | | D22 *deep-fried foods* | Chips, fried dough, samosas, spring roll, or deep-  fried vegetables? | YES or NO | |  | Yesterday, did you have any of the following beverages? |  | | D23 *fluid milk* | Milk or milk powder, including milk in coffee or  milk in tea? | YES or NO | | D24 *SSBs* | Soft drinks leslassa, such as Coke, Fanta, Sprite, Melkam Moringa leslassa, Sofi Malt or Malta  Guinness? | YES or NO | | D25.1 *Fruit juice 1* | Packed fruit juice or fruit drinks | YES or NO | | D25.2 *Fruit juice 2* | Fresh fruit juice prepared at home or fruit shops? | YES or NO | | D26 *sweet tea/coffee* | Tea with sugar, coffee with sugar, sprisse with  sugar, macchiato, or milk with sugar? | YES or NO | | D27 *fast food* | Yesterday, did you get food from any place like  Chicken Hut, Pizza Hut, Wow burger, In-and-Out, Kaldis burger or any cafe burger? | YES or NO | | | | | | | | | | | | | |
| PART 5: DIET AND FEEDING PATTERNS | | | | | | | | | | | | |
| Q501 | What kind of food you always eat? | | | | 1.Sorghum with watt  2.Teff Injera with watt  3.Maize  4.Barley  5.Others specify ---------- | | | | |  |
| Q502 | How is your eating pattern of diversified meals? | | | | 1.Monotonies diet  2.Sometimes different  3. Different | | | | |  |
| Q503 | How many meals do you eat a day breakfast, lunch, dinner, snacks? | | | | 1-2 meals a day  3-4 meals a day  5-6 meals a day  more than 6 meals a day | | | | |  |
| Q503 | How often do you have hot meals? | | | | several times a day  once daily  more than 3 times a week  less than 3 times a week  never | | | | |  |
| Q504 | How many times a day do you eat vegetables? Examples of vegetables are green salad, corn, green beans, carrots, potatoes, greens, and squash. Include fresh, canned and frozen vegetables. Do not count french fries, potato chips or rice. | | | | I rarely eat vegetables  Less than 1 time a day a couple times a week  1 time a day  2 times a day  3 times a day  4 or more times a day | | | | |  |
| Q505 | Over the last week, how many days did you eat red and orange vegetables? | | | | 1.I did not eat red and orange vegetables  2. 1 day a week  3. 2 days a week  4. 3 days a week  5. 4 days a week  6. 5 days and more | | | | |  |
|  | Over the last week, how many days did you eat dark green vegetables? Examples of dark green vegetables are broccoli, spinach, dark green lettuce, turnip greens, or mustard greens. | | | | 1.I did not eat dark green vegetables  2. 1 day a week  3. 2 days a week  4. 3 days a week  5. 4 days a week  6. 5 days a week and more | | | | |  |
| Q506 | How often do you drink regular sodas not diet? | | | | Never  1 − 3 times a week  4 − 6 times a week  1 time a day  2 times a day  3 times a day  4 or more times a day | | | | |  |
| Q507 | How many total serving fruit and vegetable should you eat? | | | | At least once per day  Two times per day  Three times per day  Other specify  none | | | | |  |
| Q508 | Did you enjoy fast food ? | | | | yes  no | | | | |  |
| Q509 | Number of time consume fast food in a week? | | | | 0 times  1-2 times  3-4times  times or more | | | | |  |
| Q510 | Reason choosing to eat fast food ? | | | | 1.Advertisment  2. enjoy the test  3.limited time  4. cost  5. variety  6. Othersspecify ------- | | | | |  |
| Q511 | Are you aware about nutrition information and ingredients in each of fast food that you consume ? | | | | 1.Yes  2. No | | | | |  |
| Q512 | Do you think your food preference has been influence by your friend? | | | | Yes  No | | | | |  |
| Q513 | Are you concern about your daily calories intake when choosing something to eat? | | | | Yes  No | | | | |  |
| Q514 | What are some foods that you know are healthy for you? | | | | Please mention | | | | |  |
| Q516 | What are some foods that you consider unhealthy | | | | Please mention | | | | |  |
| Q517 | Do you Breatfeeding now ? | | | | Yes  no | | | | |  |
| Q518 | Better healthcare Service uptake | | | | Yes  no | | | | |  |
| Q519 | Do you currently follow special diet ? | | | | Yes No | | | | |  |
| Q520 | If the answer is yes | | | | Weight reduction  Low cholesterol  Low sodium  Diabetic  Low fat  Ulcer  other | | | | |  |
| Q521 | For how many years ? | | | | Number of years---------------- | | | | |  |
| Q522 | How much responsible you are to choose or to plan your meals? | | | | little or none  about half  most or all | | | | |  |
| Q523 | How many serving of fruits and vegetables eat each day? | | | | 0  1-2  3-4  5 And more | | | | |  |
| Q524 | About how long have you been eaten this number of daily serving of fruit and vegetable? | | | | Less than one month  1-2 months  3-4 month  4-6 month  Longer than 6 month | | | | |  |
| Q525 | Are you seriously thinking about more serving on fruits and vegetable sometimes starting in the next six month | | | | Yes  no | | | | |  |
| PART 6: QUESTIONS TO ASSESS FOOD CONSUMPTION PATTEREN USING FOOD CONSUMPTION SCORE  "I would like to ask you about all the different foods that you have eaten in the last 7 days. | | | | | | | | | | | | |
|  | | | Food Group | Food item belonging to group | | | Circle yes or no | | If yes, Frequency of consumption days of Consumption | | | |
| Q601 | | | Cereals and tubers | Rice, pasta, bread / sorghum, millet, maize, potato, yam, cassava, white flesh sweet potato, taro and / or other tubers, plantain | | | Yes  No | |  | | | |
| Q602 | | | Pulses | Beans, cowpeas, peanuts, lentils, nut, soy, pigeon pea and / or other nuts | | | Yes  No | |  | | | |
| Q603 | | | Milk and dairy | Fresh milk / sour, yogurt, cheese, other dairy products Exclude margarine/butter or small amounts of milk for tea / coffee | | | Yes  No | |  | | | |
| Q604 | | | Meat, fish and eggs | Beef, goat, poultry, pork, eggs and fish | | | Yes  No | |  | | | |
| Q605 | | | Flesh Meat | Flesh meat: beef, pork, lamb, goat, rabbit, chicken, duck, other birds | | | Yes  No | |  | | | |
| Q606 | | | Organ Meat | Liver, kidney, heart and / or other organ meat | | | Yes  No | |  | | | |
| Q607 | | | Fish | Fish / Shellfish fish, including canned tuna, escargot, and / or other seafood fish in large quantities and not as a condiment | | | Yes  No | |  | | | |
| Q608 | | | Eggs | Eggs | | | Yes  No | |  | | | |
| Q609 | | | Vegetables | All vegetables and leaves | | | Yes  No | |  | | | |
| Q610 | | | Orange Vegetables | Orange vegetables vegetables rich in Vitamin A carrot, red pepper, pumpkin, orange sweet potatoes6 | | | Yes  No | |  | | | |
| Q611 | | | Green Vegetables | Dark green leafy vegetables spinach, broccoli, amaranth and / or other dark green leaves, cassava leaves | | | Yes  No | |  | | | |
| Q612 | | | Fruits | All Fruits | | | Yes  No | |  | | | |
| Q613 | | | Orange Fruits | Orange fruits Fruits rich in Vitamin A mango, papaya, apricot, peach. | | | Yes  No | |  | | | |
| Q614 | | | Oils and Fats | Vegetable oil, palm oil, shea butter, ghee, margarine, other fats / oil | | | Yes  No | |  | | | |
| Q615 | | | Sugar | Sugar, honey, jam, cakes, candy, cookies, pastries, cakes and other sweet sugary drinks | | | Yes  No | |  | | | |
| Q616 | | | Condiments | Condiments / Spices tea, coffee / cocoa, salt, garlic, spices, yeast / baking powder, tomato / sauce, meat or fish as a condiment, condiments including small amount of milk / tea coffee. | | | Yes  No | |  | | | |

**Part 7 Household Food Insecurity Access Scale (HFIAS) for Measurement of Food
Access**Household Food Insecurity Access Scale (HFIAS) Measurement Tool

| No. | Question | Response Options | Code |
| --- | --- | --- | --- |
| 701 | In the past four weeks, did you worry that your household would not have enough food? | 0 = No (skip to Q2)  1=Yes | [____] |
| 701.a | How often did this happen? | 1 = Rarely (once or twice in the past four weeks)  2 = Sometimes (three to ten times in the past four weeks  3 = Often (more than ten times in the past four weeks) | [____] |
| 702 | In the past four weeks, were you or any household member not able to eat the kinds of foods you preferred because of a lack of resources? | 0 = No (skip to Q3)  1=Yes | [____] |
| 702.a | How often did this happen? | 1 = Rarely (once or twice in the past four weeks)  2 = Sometimes (three to ten times in the past four weeks  3 = Often (more than ten times in the past four weeks) | [____] |
| 703 | In the past four weeks, did you or any household member have to eat a limited variety of foods due to a lack of resources? | 0 = No (skip to Q4)  1 = Yes | [____] |
| 703.a | How often did this happen? | 1 = Rarely (once or twice in the past four weeks)  2 = Sometimes (three to ten times in the past four weeks  3 = Often (more than ten times in the past four weeks) | [____] |
| 704. | In the past four weeks, did you or any household member have to eat some foods that you really did not want to eat because of a lack of resources to obtain other types of food? | 0 = No (skip to Q5)  1 = Yes | [____] |
| 704.a | How often did this happen? | 1 = Rarely (once or twice in the past four weeks)  2 = Sometimes (three to ten times in the past four weeks  3 = Often (more than ten times in the past four weeks) | [____] |
| 705. | In the past four weeks, did you or any household member have to eat a smaller meal than you felt you needed because there was not enough food? | 0 = No (skip to Q2)  1=Yes | [____] |
| 705.a | How often did this happen? | 1 = Rarely (once or twice in the past four weeks)  2 = Sometimes (three to ten times in the past four weeks  3 = Often (more than ten times in the past four weeks) | [____] |
| 706. | In the past four weeks, did you or any other household member have to eat fewer meals in a day because there was not enough food? | 0 = No (skip to Q2) 1=Yes | [____] |
| 706.a | How often did this happen? | 1 = Rarely (once or twice in the past four weeks) 2 = Sometimes (three to ten times in the past four weeks 3 = Often (more than ten times in the past four weeks) | [____] |
| 707 | In the past four weeks, was there ever no food to eat of any kind in your household because of lack of resources to get food? | 0 = No (skip to Q2) 1=Yes | [____] |
| 707.a | How often did this happen? | 1 = Rarely (once or twice in the past four weeks) 2 = Sometimes (three to ten times in the past four weeks 3 = Often (more than ten times in the past four weeks) | [____] |
| 708. | In the past four weeks, did you or any household member go a whole day and night without eating anything because there was not enough food? | 0 = No (skip to Q2) 1=Yes |  |
| 708.a | |  |  | | --- | --- |   How often did this happen? | 1 = Rarely (once or twice in the past four weeks) 2 = Sometimes (three to ten times in the past four weeks 3 = Often (more than ten times in the past four weeks) | [____] |
| 709 | In the past four weeks, did you or any household member go a whole day and night without eating anything because there was not enough food? | 0 = No (skip to Q2) 1=Yes | [____] |
| 709.a | How often did this happen? | 1 = Rarely (once or twice in the past four weeks) 2 = Sometimes (three to ten times in the past four weeks 3 = Often (more than ten times in the past four weeks) | [____] |
