# Supplementary material
Source: Research Square preprint supplement (doi:10.21203/rs.3.rs-9784287/v1)
Supplement: Supplementary file 2 [file 771fdfb496558bef731f9e73.docx]

Table 1. Sociodemographic and economic characteristics of WRA women in chiro district, Eastern Ethiopia, 2024 (n=608).

| **Women characteristics P-beneficiary households(304) Non-PSNP beneficiary households (304)** | |
| --- | --- |
| **Age** | **<30 77(25.3%) 80(26.3%)** |
| **31-40 162(53.3%) 151(49.7%)** |
| **>40 65(21.4%) 73(24%)** |
| **Marital status** | **Married 231(76%) 209(68.8%)** |
| **Divorced 19(6.3%) 20(6.6%)** |
| **Widowed 23(7.6%) 27(8.9%)** |
| **Single 31(10.2%) 48(15.8%)** |
| **Educational status** | **No formal education 141(46.3%) 139(45.7%)** |
| **Primary education 124(40%) 135(44.4%)** |
| **Secondary education and above 39(12.8%) 39(12.8%)** |
| **Occupation** | **Farmer 206(67.7%) 207(68%)** |
| **Merchant 41(13.4%) 62(20.3%)** |
| **Others 57(18.7%) 35(11.5%)** |
| **Family Size** | **≤3 170(55.9%) 188(61.8%)** |
| **≥4 134(44%) 116(38.1%)** |

| **Household month income (ETB)** | **≤3000 200(65.7%) 210(69%)** |
| --- | --- |
| **3001-5000 90(29.6%) 68(22.3%)** |
| **>5000 14(4.6%) 26(8.5%)** |
| **Presence of Agricultural Land** | **Yes 259(85.1%) 267(87.8%)** |
| **No 45(14.8%) 37(12.1%)** |
| **Presence of income generating pet** | **Yes 19(6.2%) 135(44.4%)** |
| **No 205(67.4%) 169(55.5%)** |
| **Money spent daily for food** | **<100 72(23.6%) 79(25.9%)** |
| **100-200 139(45.7%) 161(52.9%)** |
| **>200 66(21.7%) 29(9.5%)** |
| **I don’t know 27(8.8%) 35(11.5%)** |
| **Presence of food not eaten because of price** | **Yes 154(50.6%) 106(34.8%)** |
| **No 150(49.4%) 198(65.3%)** |

**Table 2: comparison of consumption of food groups between PSNP beneficiary households and non PSNP households among WRA in chiro district in 2024(N=608)**

| **Food items** | **Frequency (%)** |  | |
| --- | --- | --- | --- |
|  | **PSNP beneficiary households (%)** | | **Non PSNP households (%)** |
| Grains | 158(52%) | 182(59.9%) | |
| Pulses | 234(77%) | 249(81.9) | |
| Nuts and seeds | 158(52%) | 182(59.9%) | |
| Diary/milk products | 97(31.9%) | 109(35.9%) | |
| Meat, poultry and fish | 61(20.1%) | 59(19.4%) | |
| Eggs | 113(37.2%) | 142(77%) | |
| DGLVs | 76(25.3%) | 93(30.6%) | |
| Other vitamin A rich fruit and vegetables | 46(15.1%) | 77(25.3%) | |
| Other vegetables | 131(43.1%) | 140(46.1%) | |
| Other fruits | 61(20.1%) | 74(24.3%) | |

Factors associated with inadequate consumption of vitamin A-rich foods

**Table 3:** Bivariable and multivariable logistic regression of factors associated with dietary diversity among WRA in eastern Ethiopia(n=608)

| Variables Category | | WRA Dietary diversity COR AOR P-Value | |
| --- | --- | --- | --- |
| Adequate Inadequate |  |
| Age | <20 55(26.2%) 102(25.6%) 1.1(0.6-1.8) | | |
| 21-30 103(49.0%) 210(52.8%) 1.2(0.8-1.8) | | |
| >30 52(24.8%) 86(21.6%) 1 | | |
| PSNP Membership | Yes 94(44.8%) 210(52.8%) 0.7(0.5-1)* 0.7(0.5-1.08) 0.12 | | |
| No 116(55.2%) 188(47.2%) 1 | | |
| Educational status | No formal 87(41.4%) 193(48.5%) 1.4(0.5-2.4)education | | |
| Primary 96(45.7%) 163(41%) 1.04(0.6-1.8)education | | |
| Secondary 27(12.9%) 42(10.6%) 1educationand above | | |
| Marital status | Married 146(69.5%) 294(73.9%) 1.3(0.8-2.2) * 1.2(0.7-2.1) | | |
| Divorced 12(5.7%) 27(6.8%) 1.5(0.6-3.4) 1.7(0.7-4.0) | | |
| Widowed 20(9.5%) 30(7.5%) 1.02(0.4-2.6) 1.2(0.6-2.8) | | |
| Single 32(15.2%) 47(11.8%) 1 1 | | |
| Family size | **≤3** 138(65.7%) 220(55.3%) 1 1 | | |
| **4-6** 69(32.9%) 166(41.7%) 1.5(0.6-2.1) * 1.5(1.06-2.2)** 0.001 | | |
| **≥6** 3(1.4%) 12(3%) 2.5(0.6-9) * 2.04(0.5-7.7) 0.19 | | |
| Occupation | Farmer 143(68.1%) 270(67.8%) 0.7(0.4-1.28) | | |
| Merchant 40(19%) 63(15.8%) 0.6(0.3-1.19) | | |
| Others 27(12.9%) 65(16.3% 1 | | |
| Having agricultural land | Yes 180(85.7%) 346(86.9%) 0.9(0.5-1.4) | | |
| No 30(14.3%) 52(13.1%) 1 | | |
| Money spent on food | <100 49(23.3.%) 102(25.6%) 1.8(1-3.3) * 1.8(0.9-3) 0.053 | | |
| 100-200 99(47.1%) 201(50.6%) 1.7(1.02-3.1) * 1.7(0.9-3) 0.053 | | |
| >200 33(15.7%) 62(15.6%) 1.6(0.8-3.1) 1.6(0.8-3.2) 0.105 | | |
| I don’t know 29(13.8%) 33(8.3%) 1 1 | | |
| Household food security | Secure 75(35.7%) 155(39.9%) 1 | | |
| Insecure 135(64.3%) 243(61.1%) 1.1(0.8-1.6) | | |
| Nutritional Status | Undernourished 198(94.3%) 378(95%) 0.8(0.4-1.8) | | |
| Non-Undernourished 12(5.7%) 20(5%) 1 | | |
| Household monthly income(ETB) | ≤3000 148(70.5%) 262(65.8%) 1.18(0.6-2.2) | | |
| 3001-5000 46(21.9%) 112(28.1%) 1.6(0.7-3.3) | | |
| >5000 16(7.6%) 24(6%) 1 | | |

* = Significant at p < 0.25, ** = Significant at p *<* 0.05, 1 = Reference group, COR = Crude odds ratio, AOR = Adjusted odds ratio, CI = Confidence interval, ETB = Ethiopian birr
